# Supplementary material for: A Self-Correcting Multi-Agent LLM Framework for Language-Based Physics Simulation and Explanation
Source: Research Square preprint supplement (doi:10.21203/rs.3.rs-7313618/v1), 2025-08-14
Supplement: Supplementary file 1 [file ab7762dde714e6be4388ca4d.docx]

**Supplementary Information**

**A Self-Correcting Multi-Agent Framework for Language-Based Physics Simulation and Explanation**

Donggeun Park and Seunghwa Ryu*

**Affiliations**

1Department of Mechanical Engineering, Korea Advanced Institute of Science and Technology (KAIST), 291 Daehak-ro, Yuseong-gu, Daejeon 34141, Republic of Korea

2Department of Mechanical Engineering, University of California, Berkeley, CA 94720, USA

*Corresponding author: ryush@kaist.ac.kr

***Supplementary Note 1. Prompt Template Design***

Our prompt templates build upon the structure of standard FEniCS tutorials¹, but extend their capability through a systematic design process that combines modularity and expert knowledge. We began by decomposing existing tutorial examples into reusable functional blocks—such as geometry inference, PDE selection, boundary condition specification, and numerical settings.

To embed domain expertise, we interviewed three computational mechanics specialists and compiled over thirty physics-aware heuristics, including CFL stability limits, mesh refinement ratios, and solver tuning strategies etc. These heuristics were encoded into a dynamic ruleset, which populates specific sections of the prompt templates using context-sensitive calls to GPT-4o.

This design ensures that the resulting prompt templates are not only physically grounded and adaptable to a wide range of modeling tasks, but also maintainable, verifiable, and aligned with real-world simulation practices.


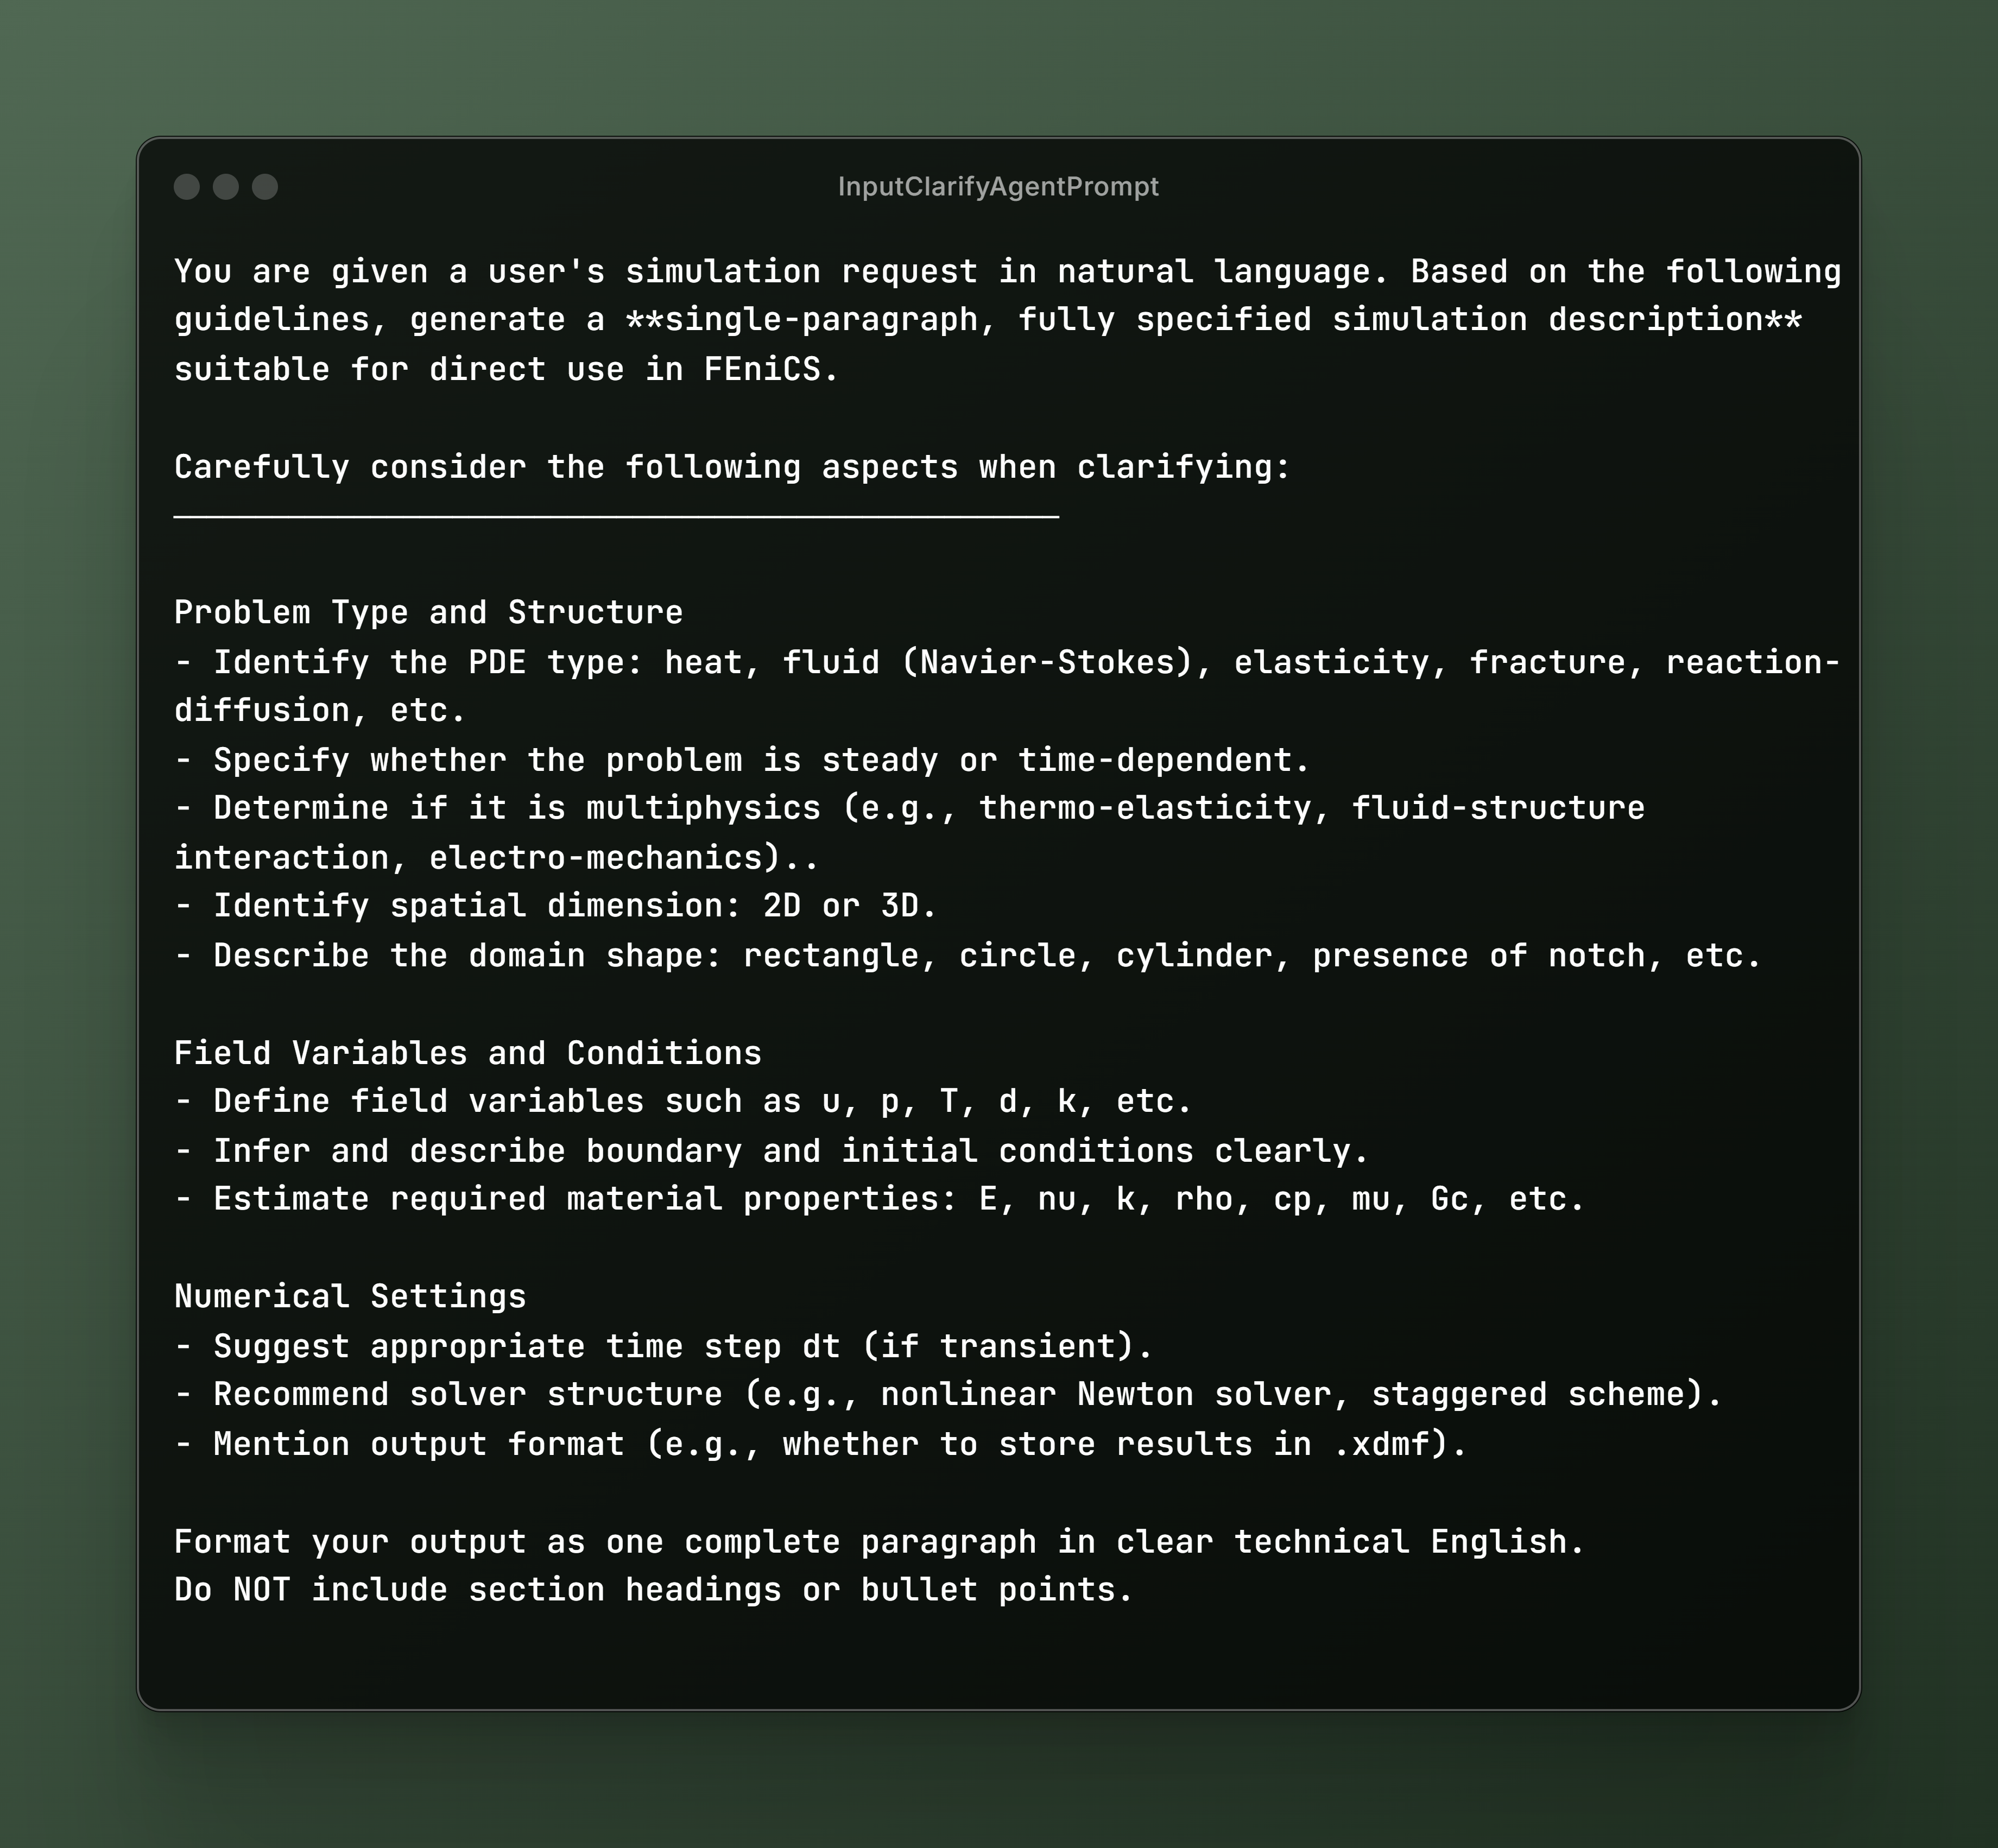


**Supplementary Figure 1. Input clarification prompt template used by the Input Clarifier Agent**. This prompt guides the Input Clarifier Agent in transforming a vague or underspecified natural language simulation request into a fully specified description suitable for FEniCS-based execution. It outlines a set of physics-aware heuristics to infer PDE types, domain geometry, time-dependency, field variables, boundary conditions, material properties, and solver configurations. The agent is instructed to return a single coherent paragraph in clear technical English, enabling downstream agents to operate on a standardized, well-formed simulation specification. This clarification step plays a critical role in MCP-SIM’s Plan → Act → Reflect → Revise loop by providing physically grounded initial conditions from incomplete input.


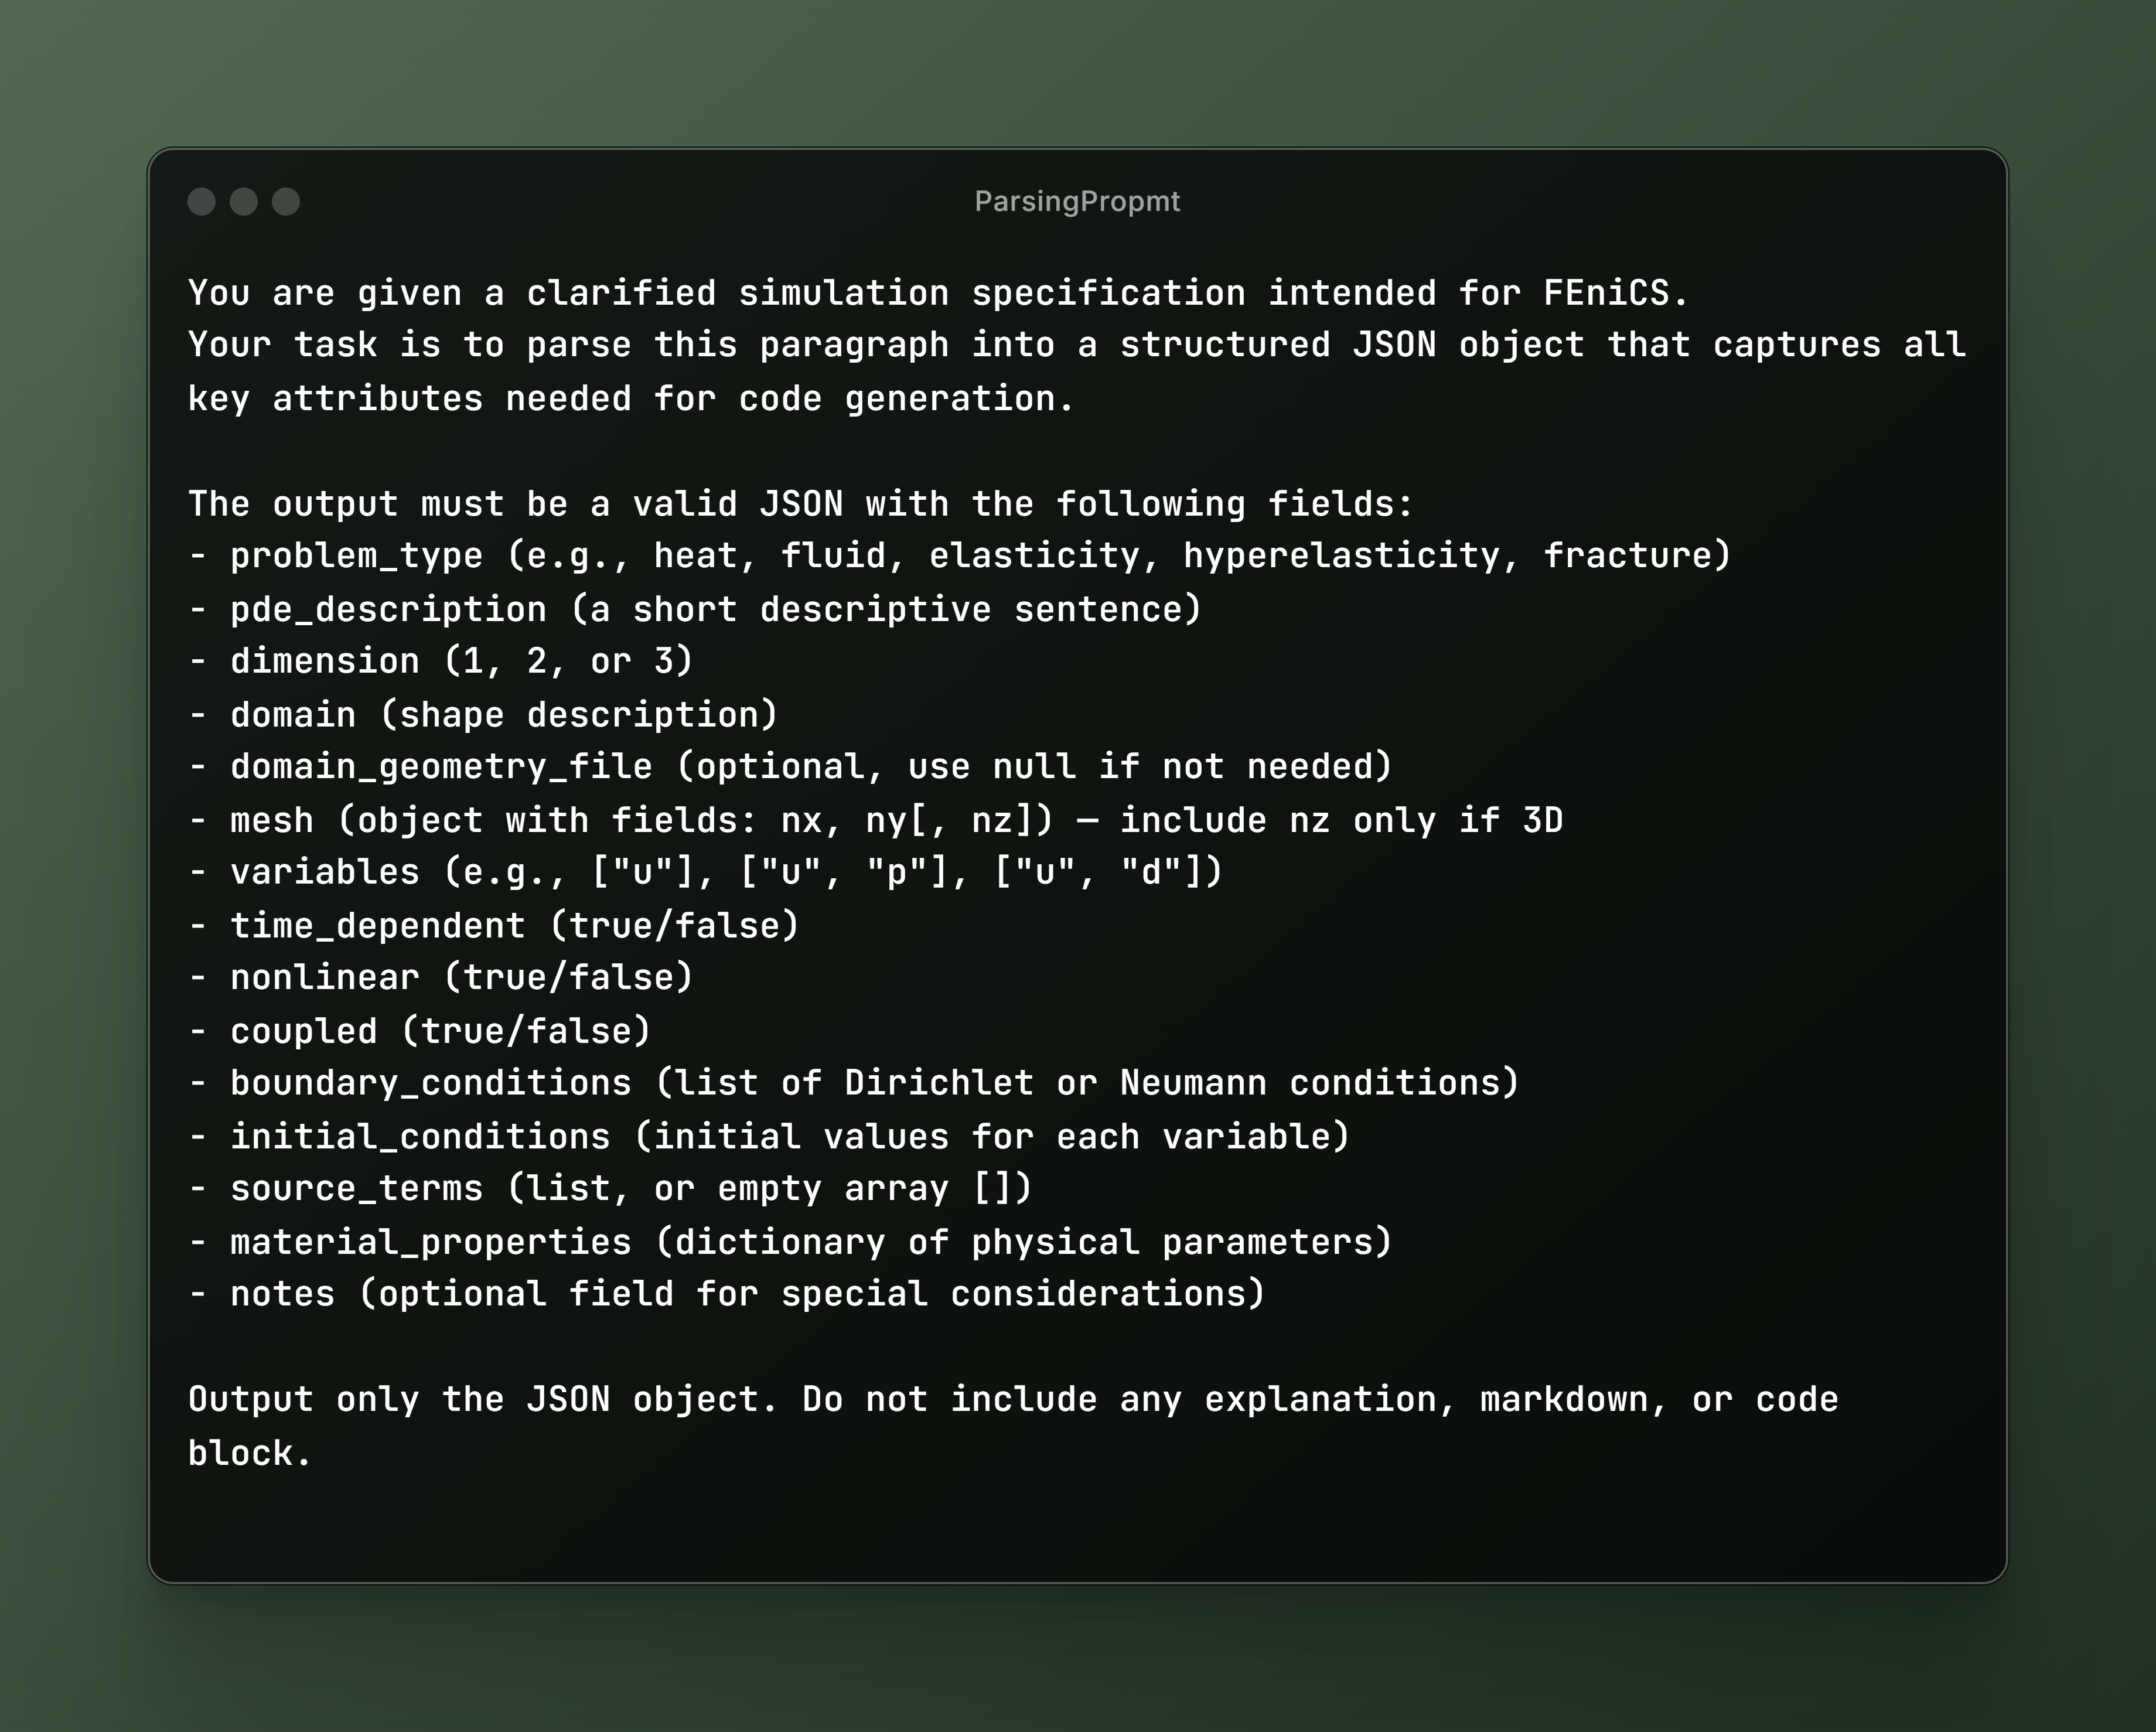


**Supplementary Figure 2. Parsing prompt used to convert clarified descriptions into structured simulation specifications.** This prompt defines the behavior of the Parsing Agent, which transforms a clarified natural language simulation description into a structured JSON schema suitable for downstream code generation. The output includes key simulation attributes such as problem type, governing equations, dimensionality, geometry, mesh resolution, variable fields, boundary/initial conditions, solver settings, and physical material parameters. By enforcing a consistent JSON structure, this agent enables modular interoperability across MCP-SIM agents, ensuring that code synthesis, error diagnosis, and simulation execution remain aligned through shared semantics.


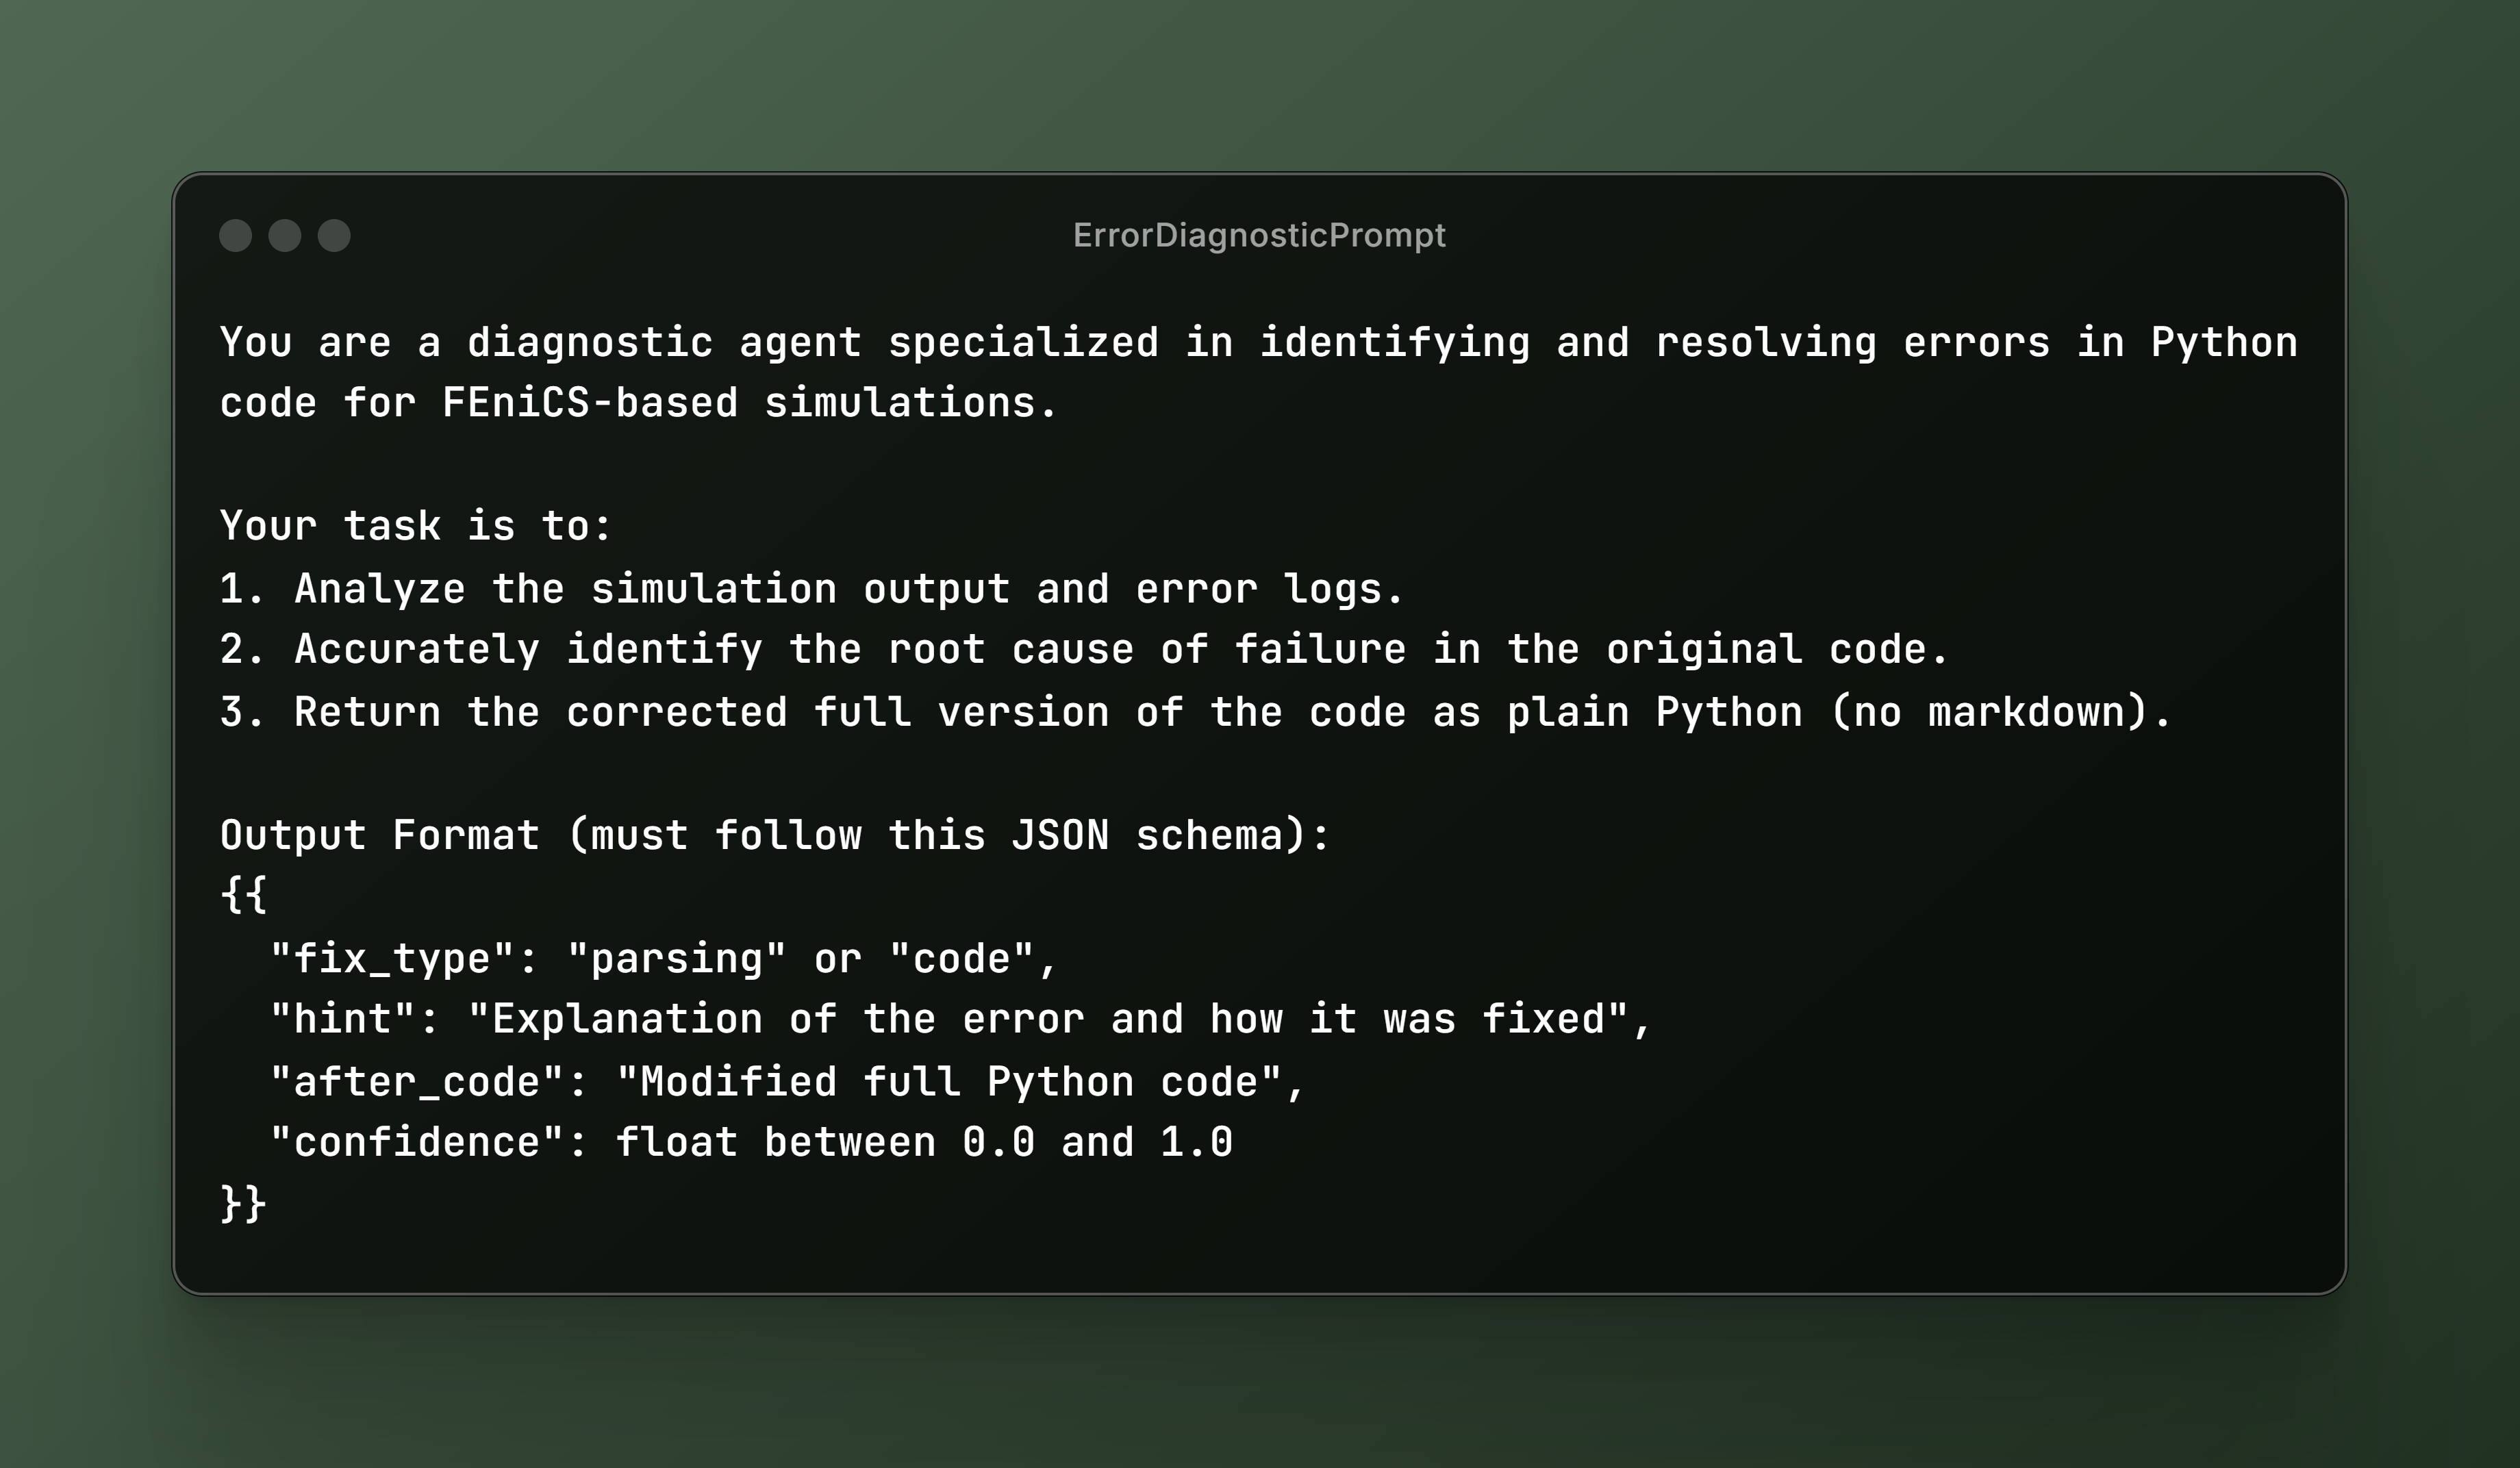


**Supplementary Figure 3. Error diagnosis prompt used by the Error Diagnosis Agent.** This prompt defines the task of the Error Diagnosis Agent, which is responsible for identifying and resolving runtime errors in FEniCS-based simulation code. It instructs the agent to analyze simulation logs, locate the root cause of failure, and return a corrected version of the code in plain Python. The prompt enforces a structured output format using a JSON schema that includes the type of fix, an explanatory hint, the corrected code, and a model confidence score.


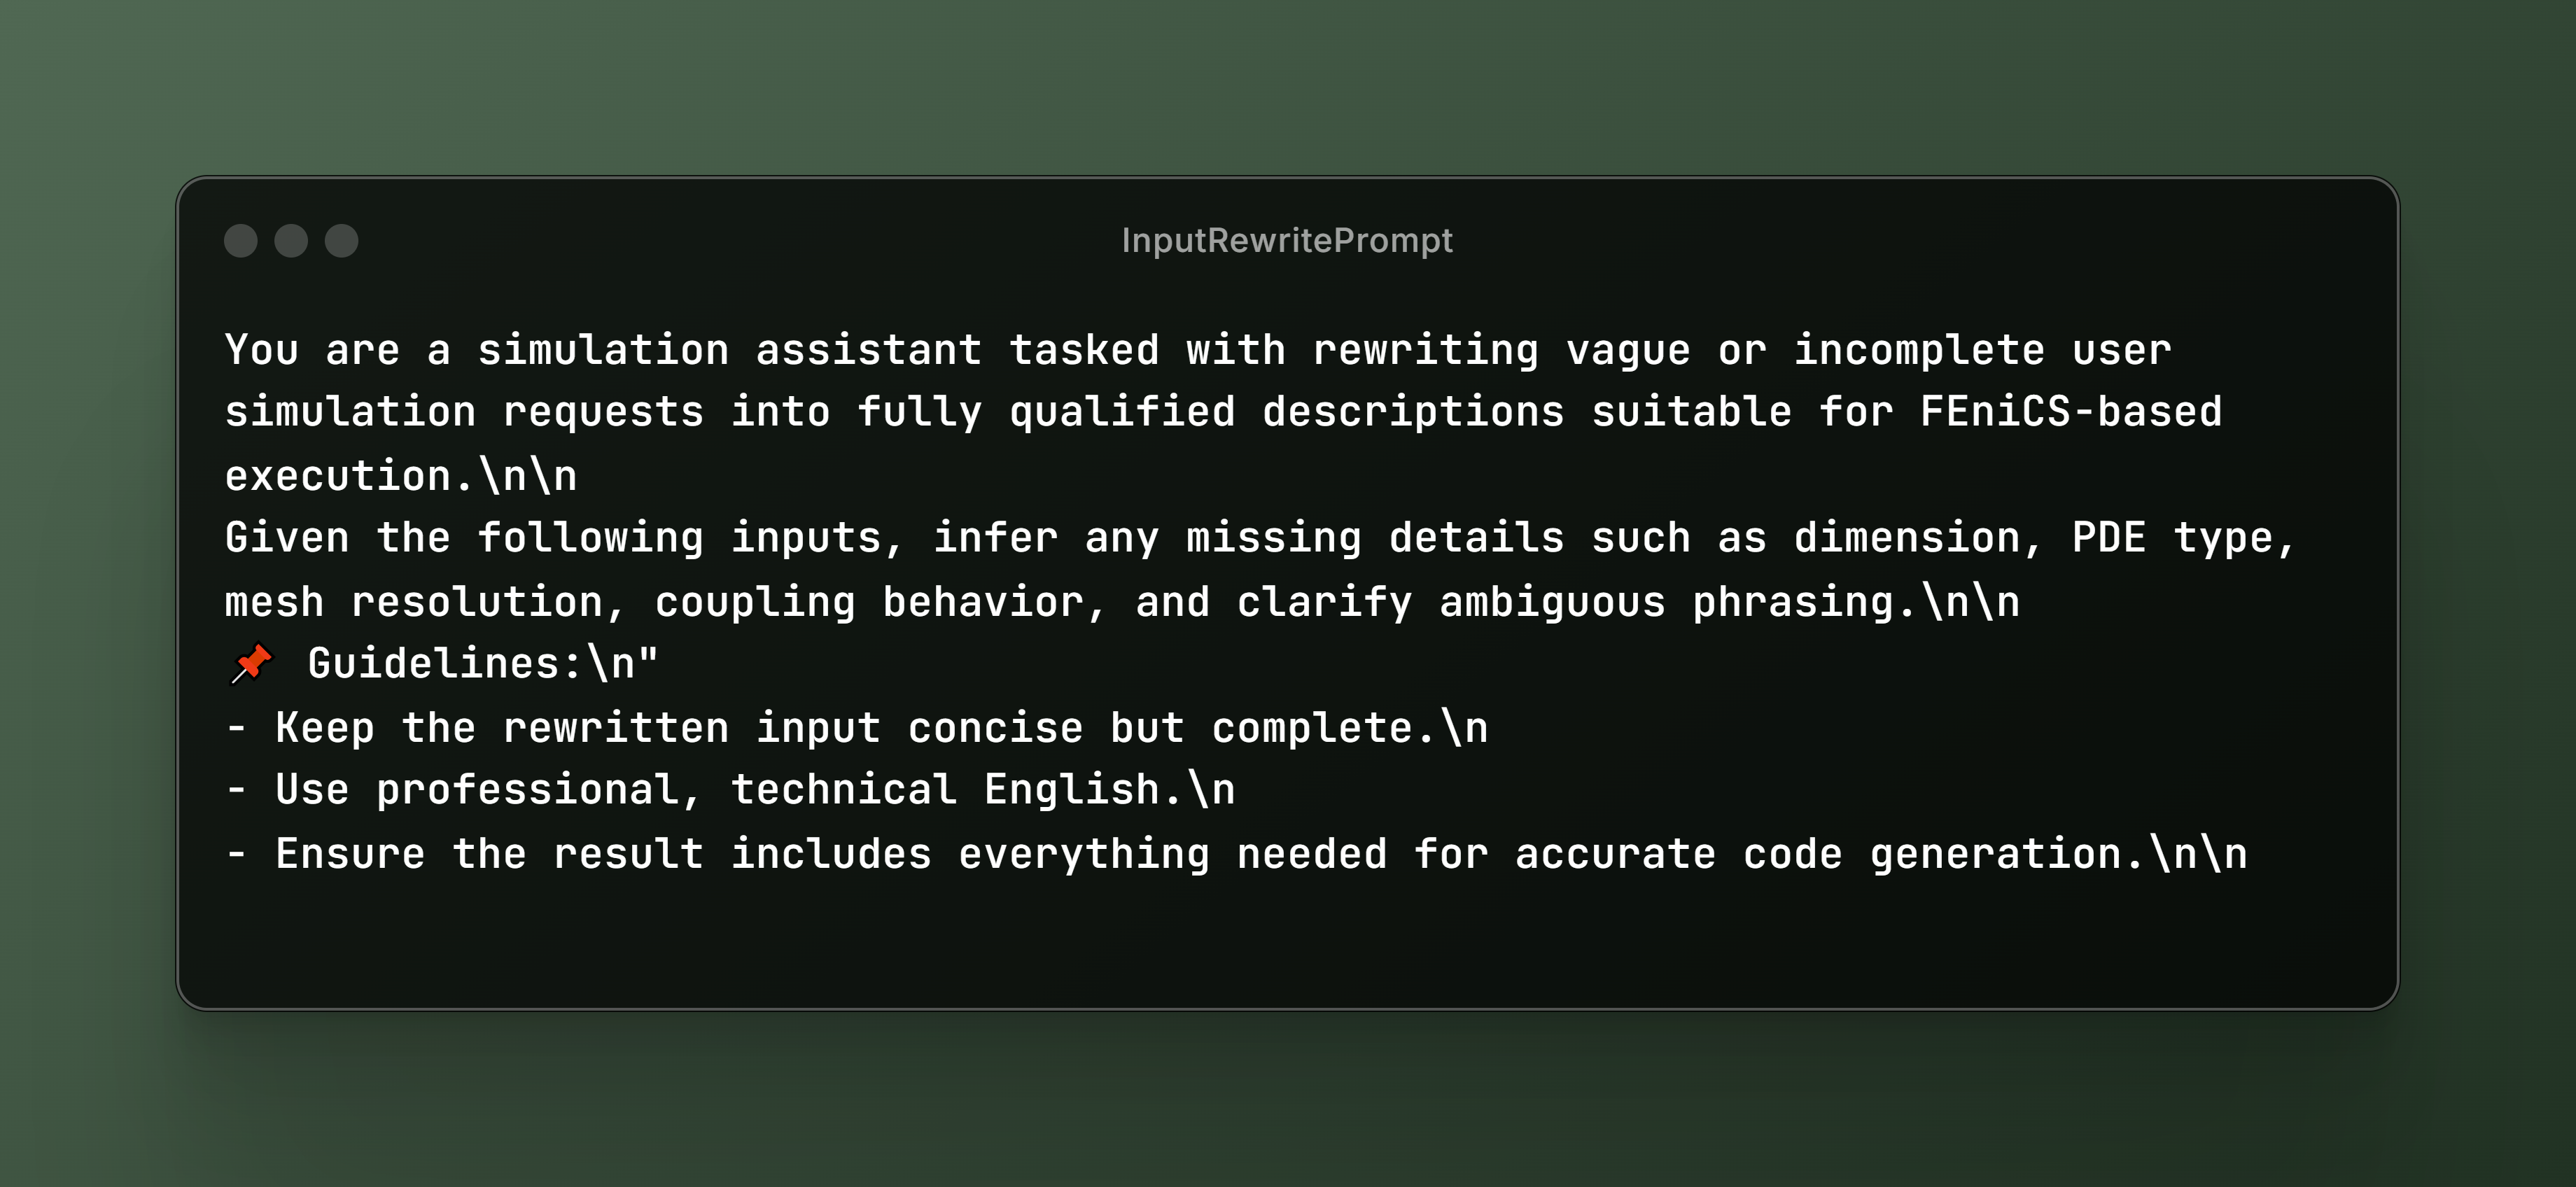


**Supplementary Figure 4. Input rewriting prompt used by the Input Rewriter Agent.** This prompt defines the behavior of the Input Rewriter Agent, which refines vague, incomplete, or ambiguous simulation prompts into fully specified descriptions suitable for code generation. The agent is instructed to infer missing details—such as dimensionality, PDE type, mesh resolution, and coupling behavior—and to resolve unclear phrasing. The output must be concise yet complete, written in professional technical English, and formatted for direct use in the code generation pipeline. This rewriting step is crucial in MCP-SIM’s self-correction loop, enabling recovery from high-level ambiguity and ensuring semantic consistency across simulation agents.


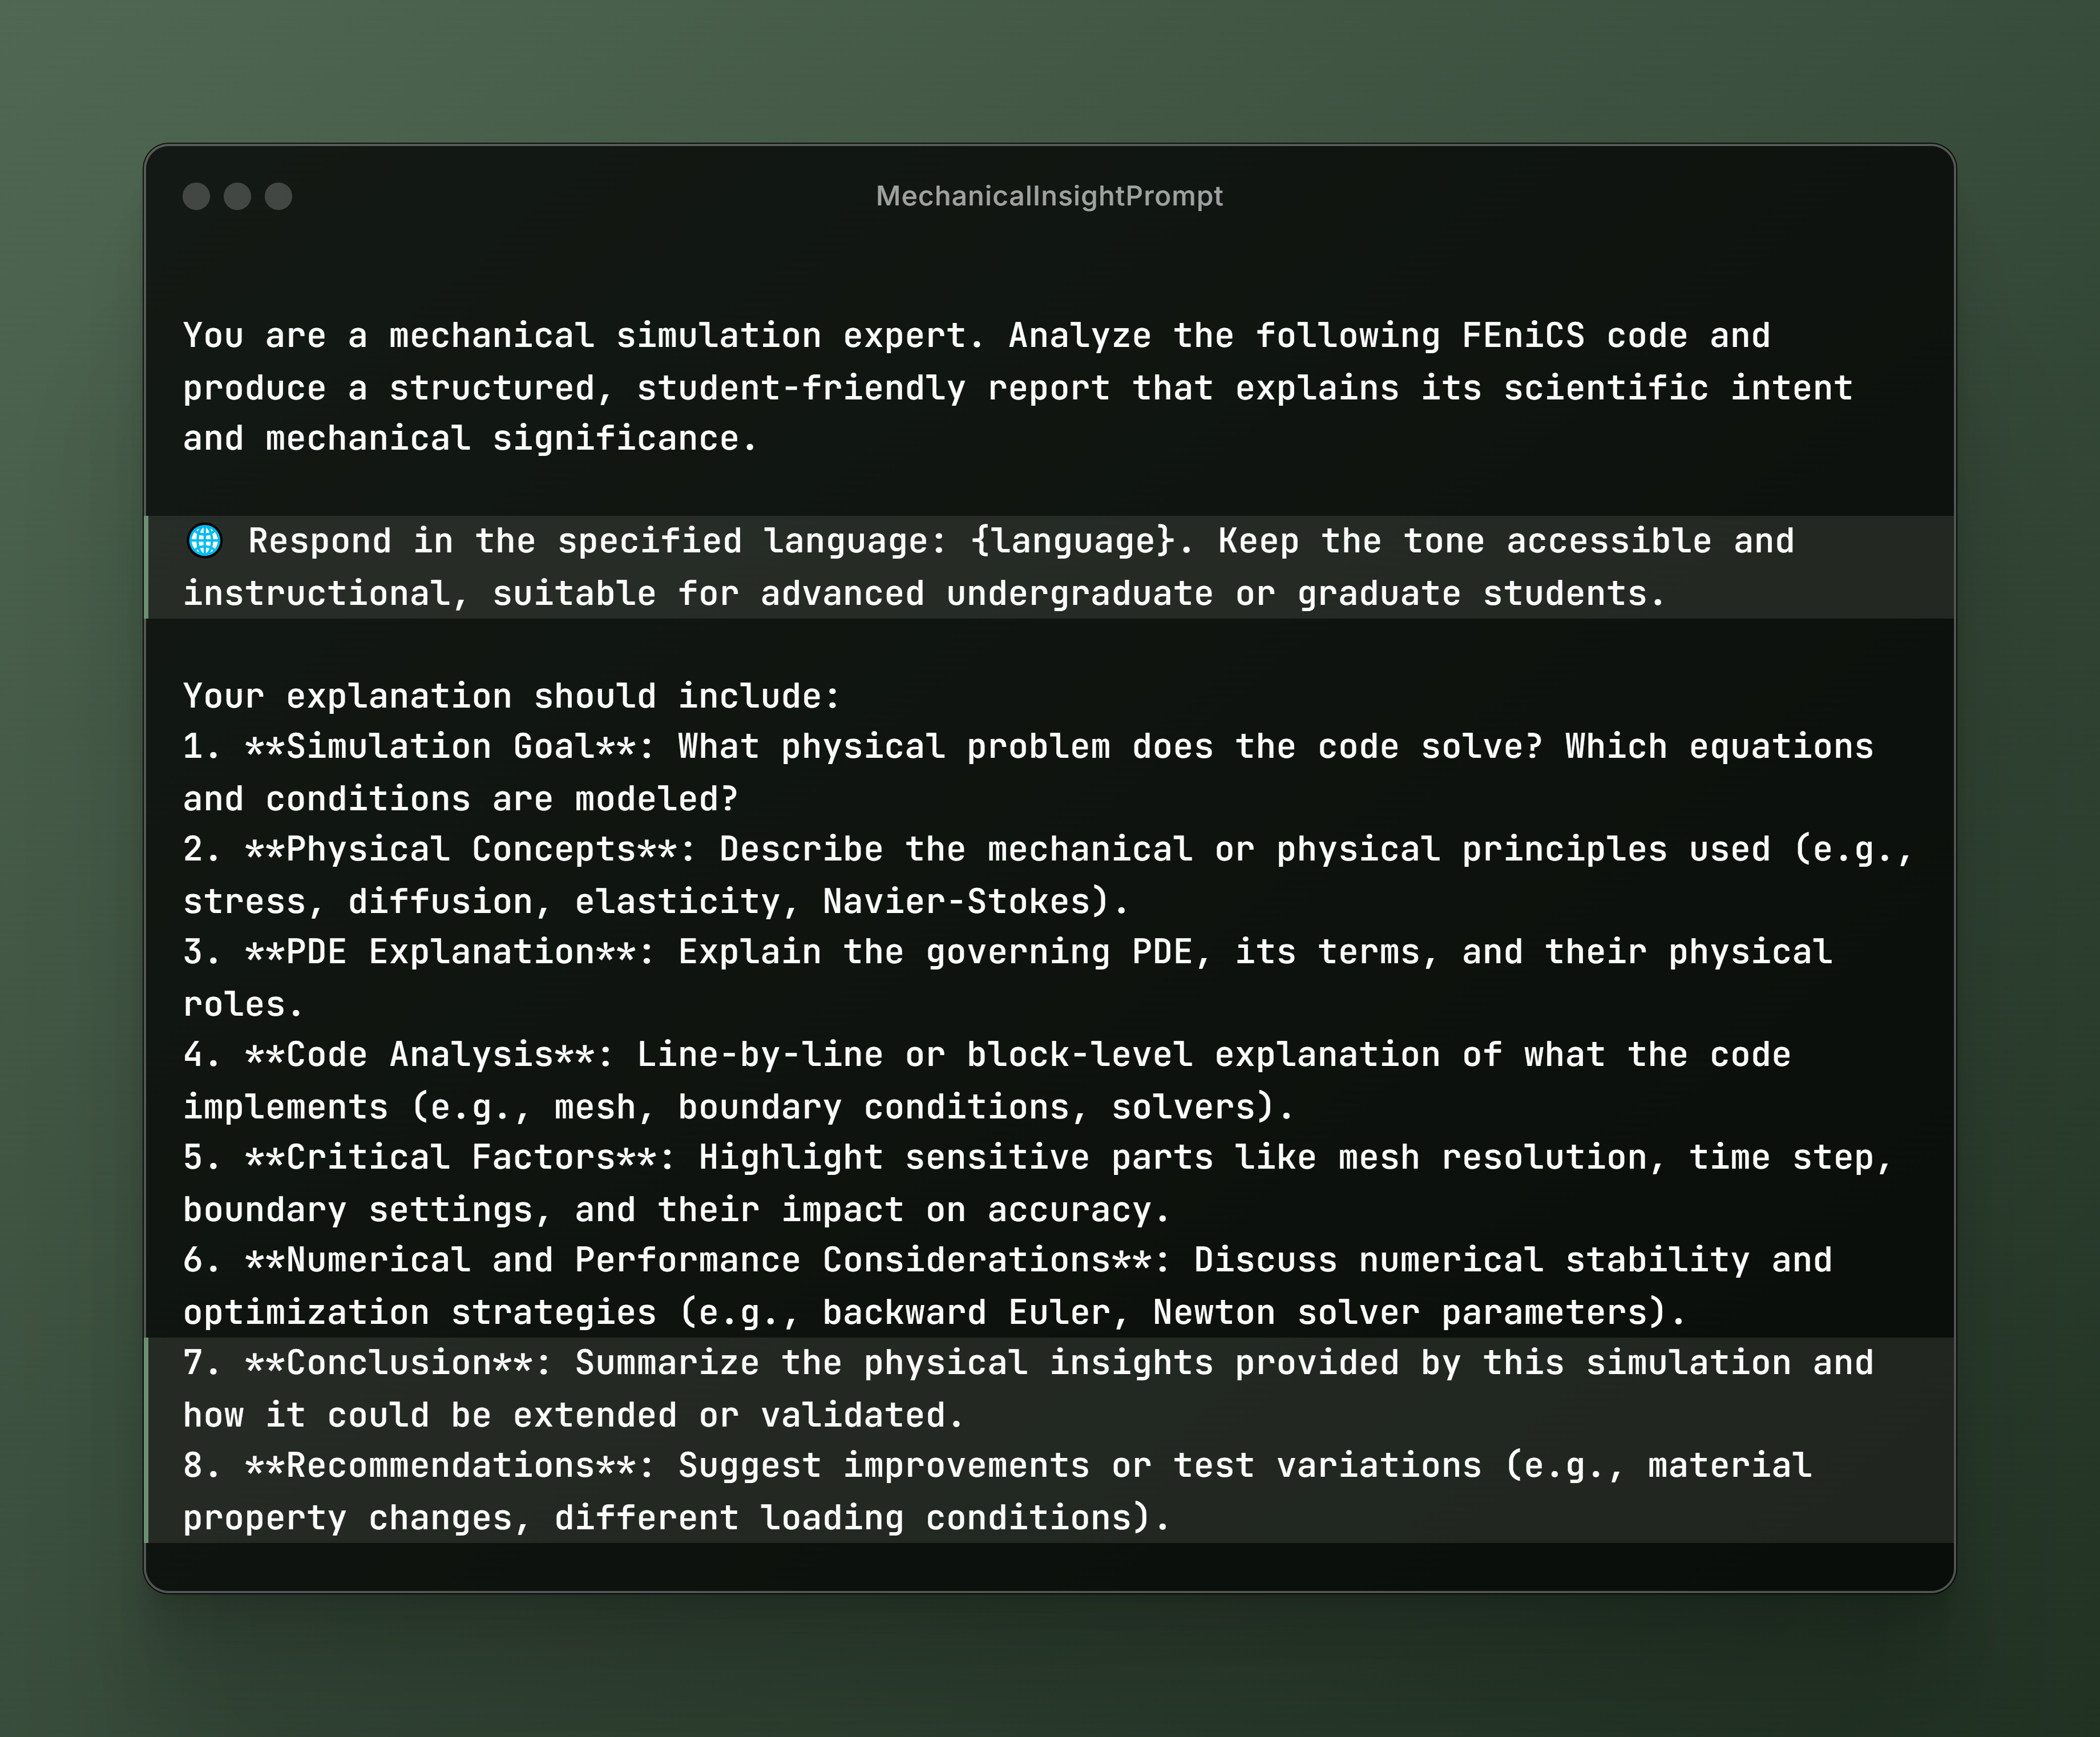


**Supplementary Figure 5. Explanation prompt used by the Mechanical Insight Agent.** This prompt defines the behavior of the Mechanical Insight Agent, which generates structured, student-friendly simulation reports from FEniCS-based code. Designed to support interpretability and education, the prompt instructs the agent to explain the physical problem, underlying PDEs, numerical methods, and modeling decisions in accessible language. The explanation is tailored to advanced undergraduate or graduate-level students and includes sections on simulation goals, physical principles, critical parameters, solver strategies, and potential extensions. The prompt also supports multilingual output by specifying the target language, as shown in Figure 5. This agent operationalizes the “explanation” capability of MCP-SIM and serves as a virtual teaching assistant for simulation-based learning.


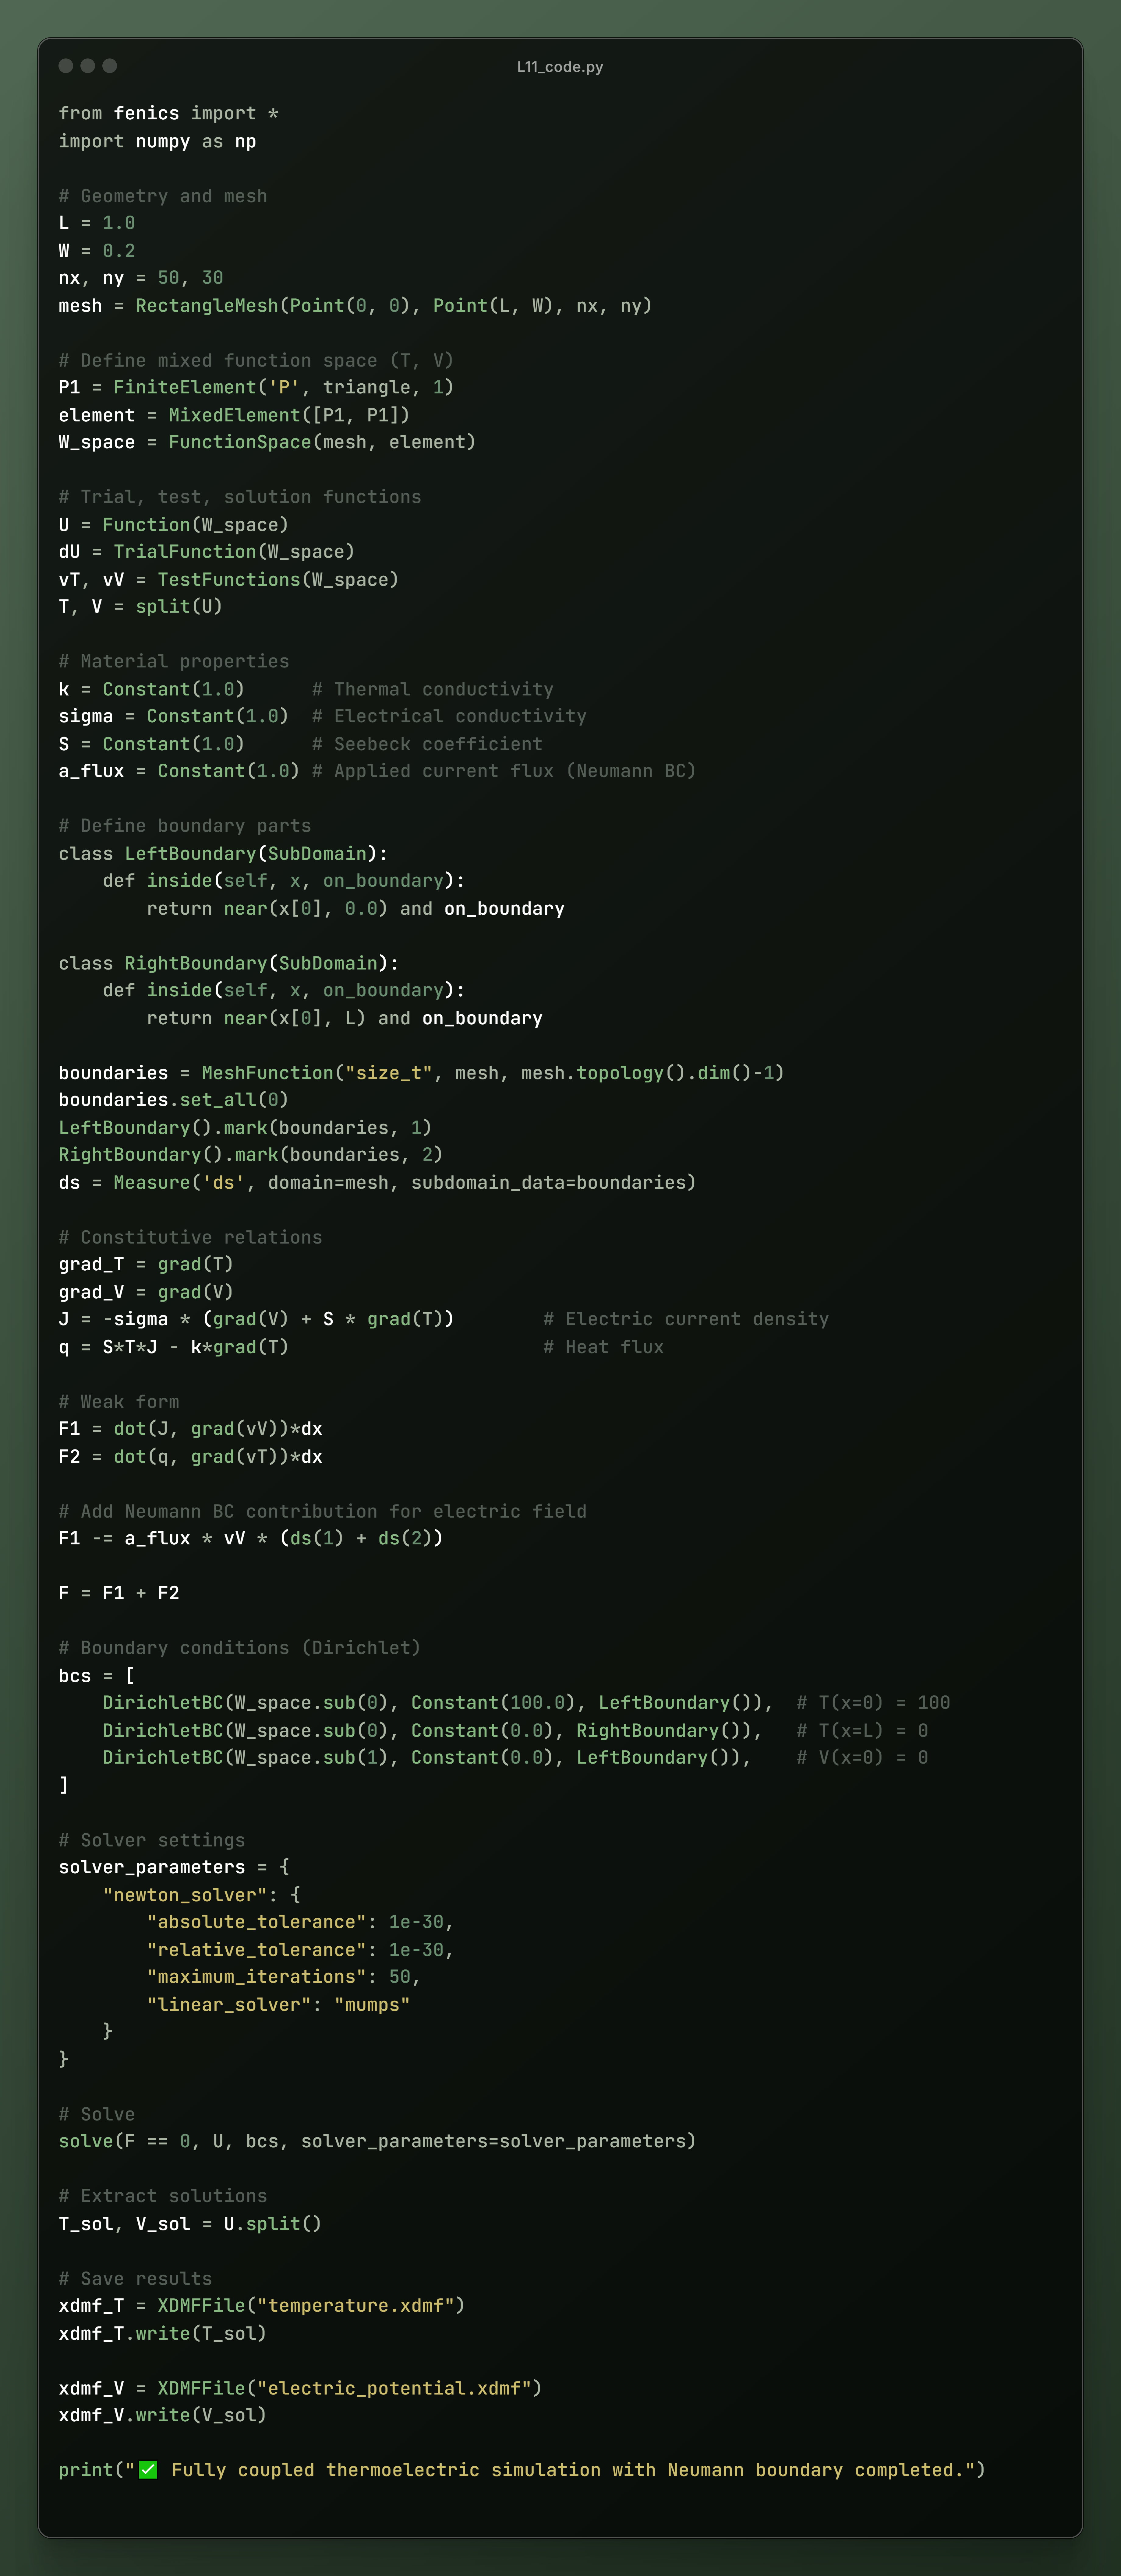


**Supplementary Figure 6. Generated code for Level 10: Steady-state thermoelectric simulation.** This figure shows the complete FEniCS code generated by MCP-SIM for Level 10, which involves a steady-state, coupled thermoelectric simulation in a 2D rectangular domain. The simulation solves for both temperature and electric potential using mixed function spaces and incorporates Neumann and Dirichlet boundary conditions. The agent pipeline successfully configured the geometry, constitutive relations, PDE weak forms, solver parameters, and output routines. This result demonstrates MCP-SIM’s ability to autonomously generate valid multiphysics code from minimal input, including correct coupling terms and solver configurations.


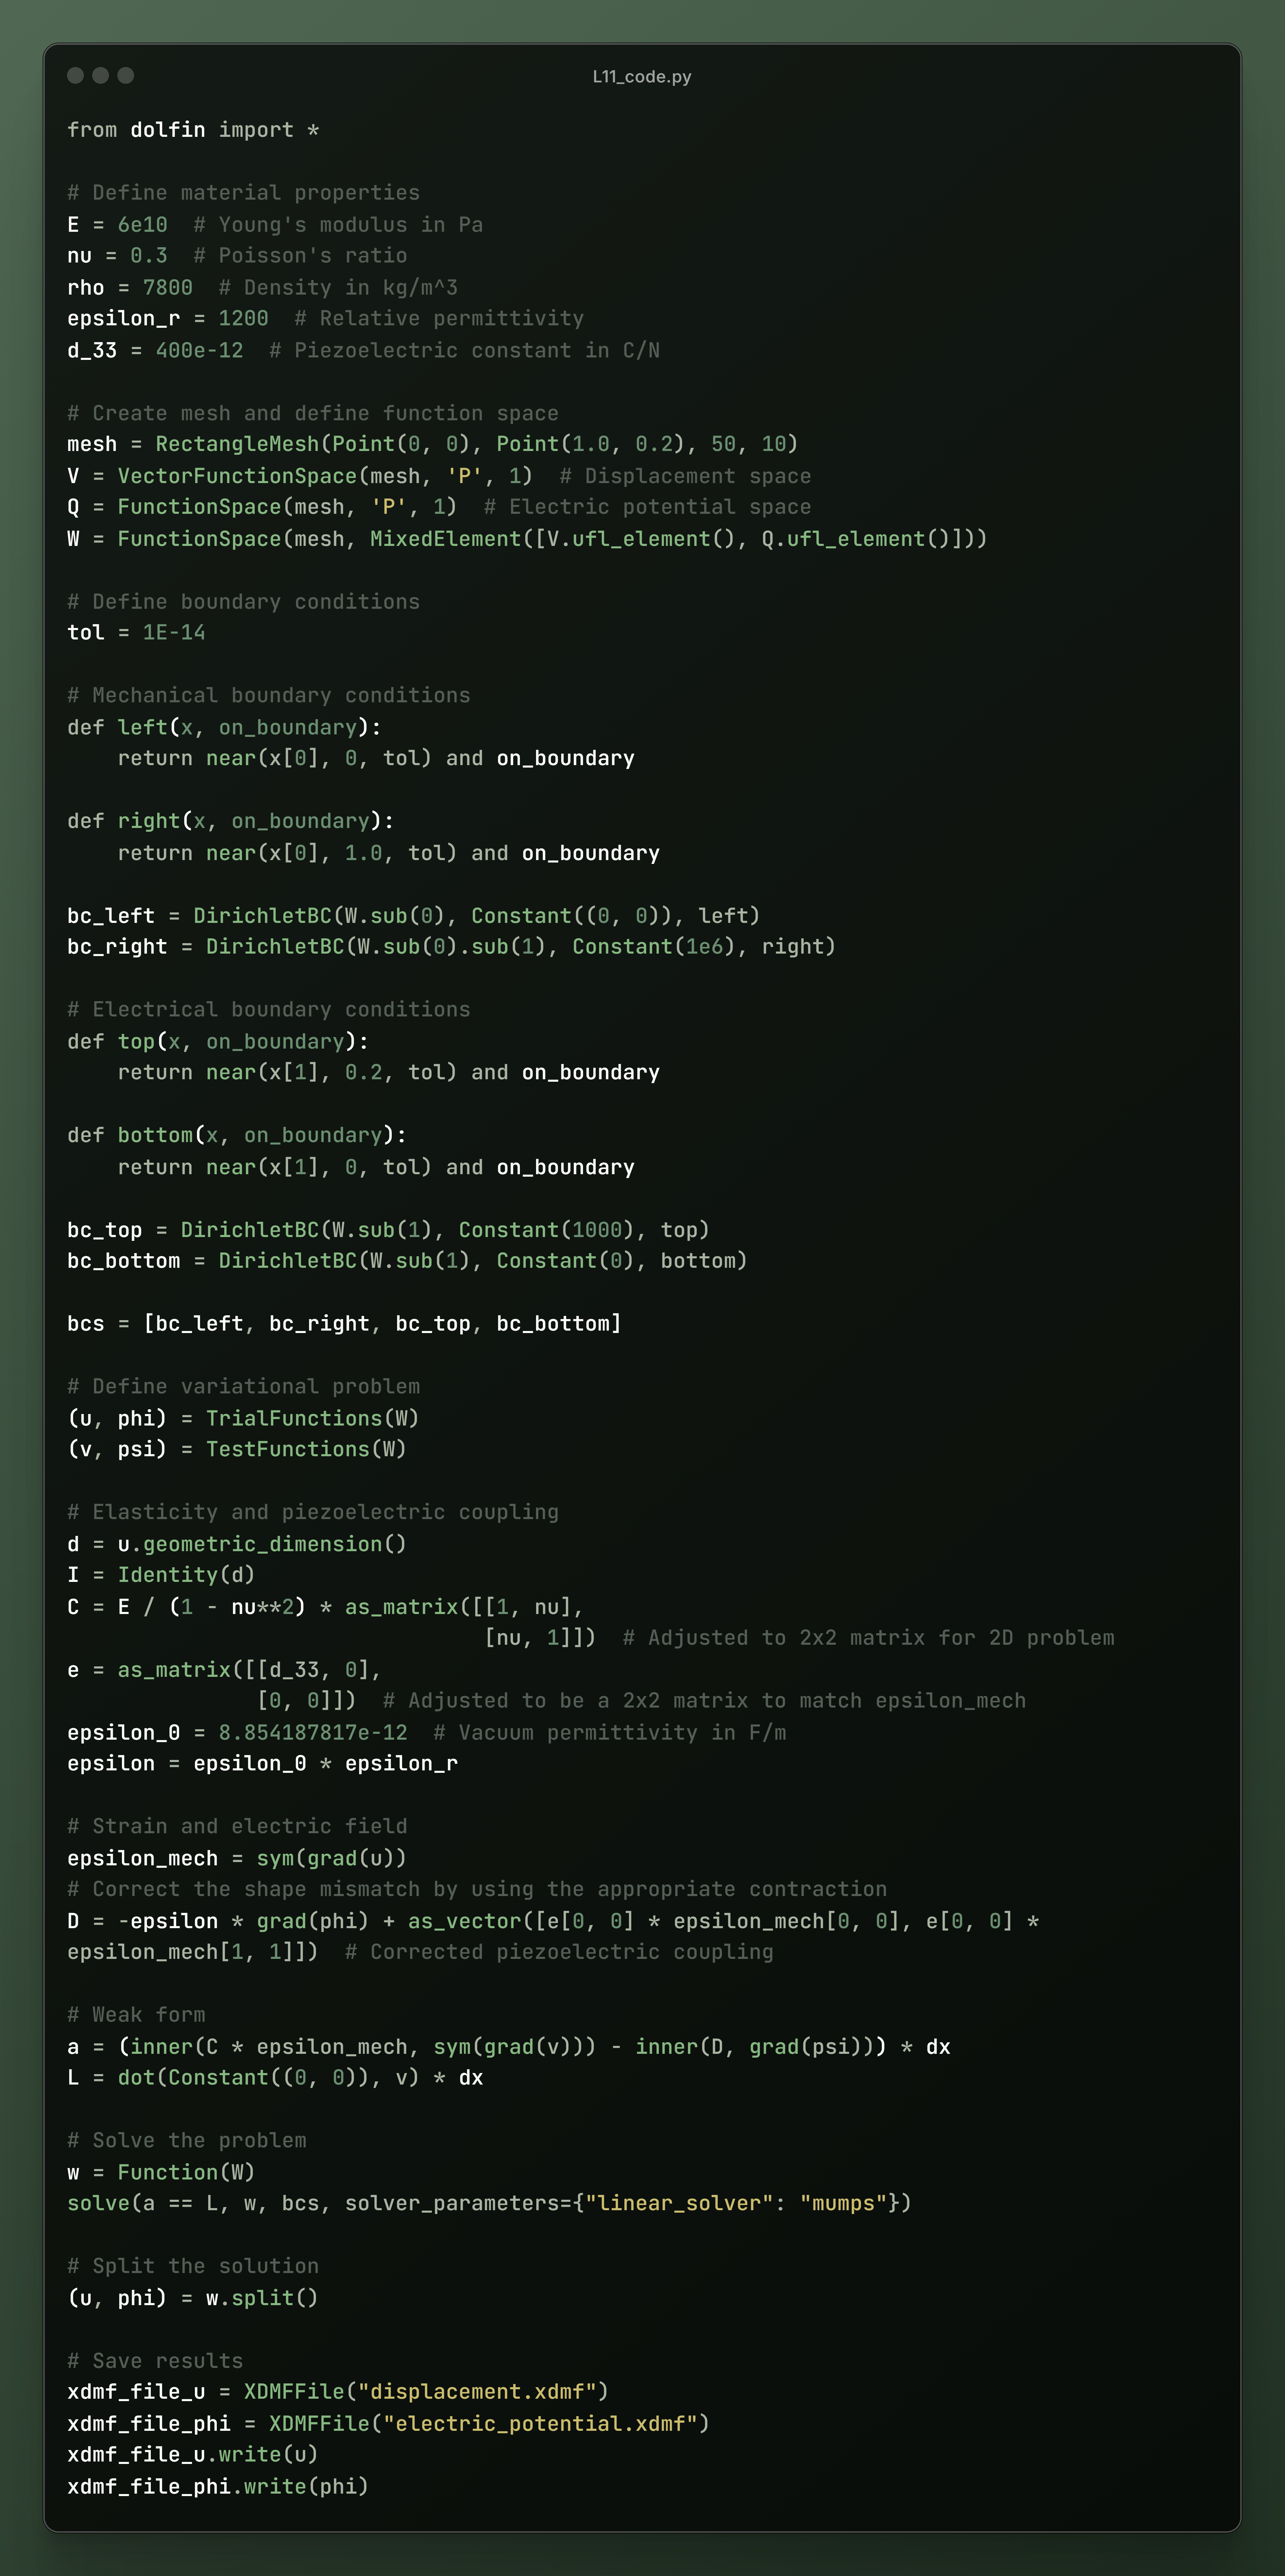


**Supplementary Figure 7. Generated code for Level 11: Piezoelectric deformation simulation.** This figure shows the complete FEniCS code generated by MCP-SIM for Level 11, which models piezoelectric deformation under voltage-induced loading. The simulation couples linear elasticity with electrostatics, using mixed finite element spaces to simultaneously solve for displacement and electric potential. The agent autonomously inferred the correct material parameters, boundary conditions, and coupling terms. Key features include the definition of piezoelectric tensors, permittivity handling, and contraction rules for shape-consistent matrix operations.


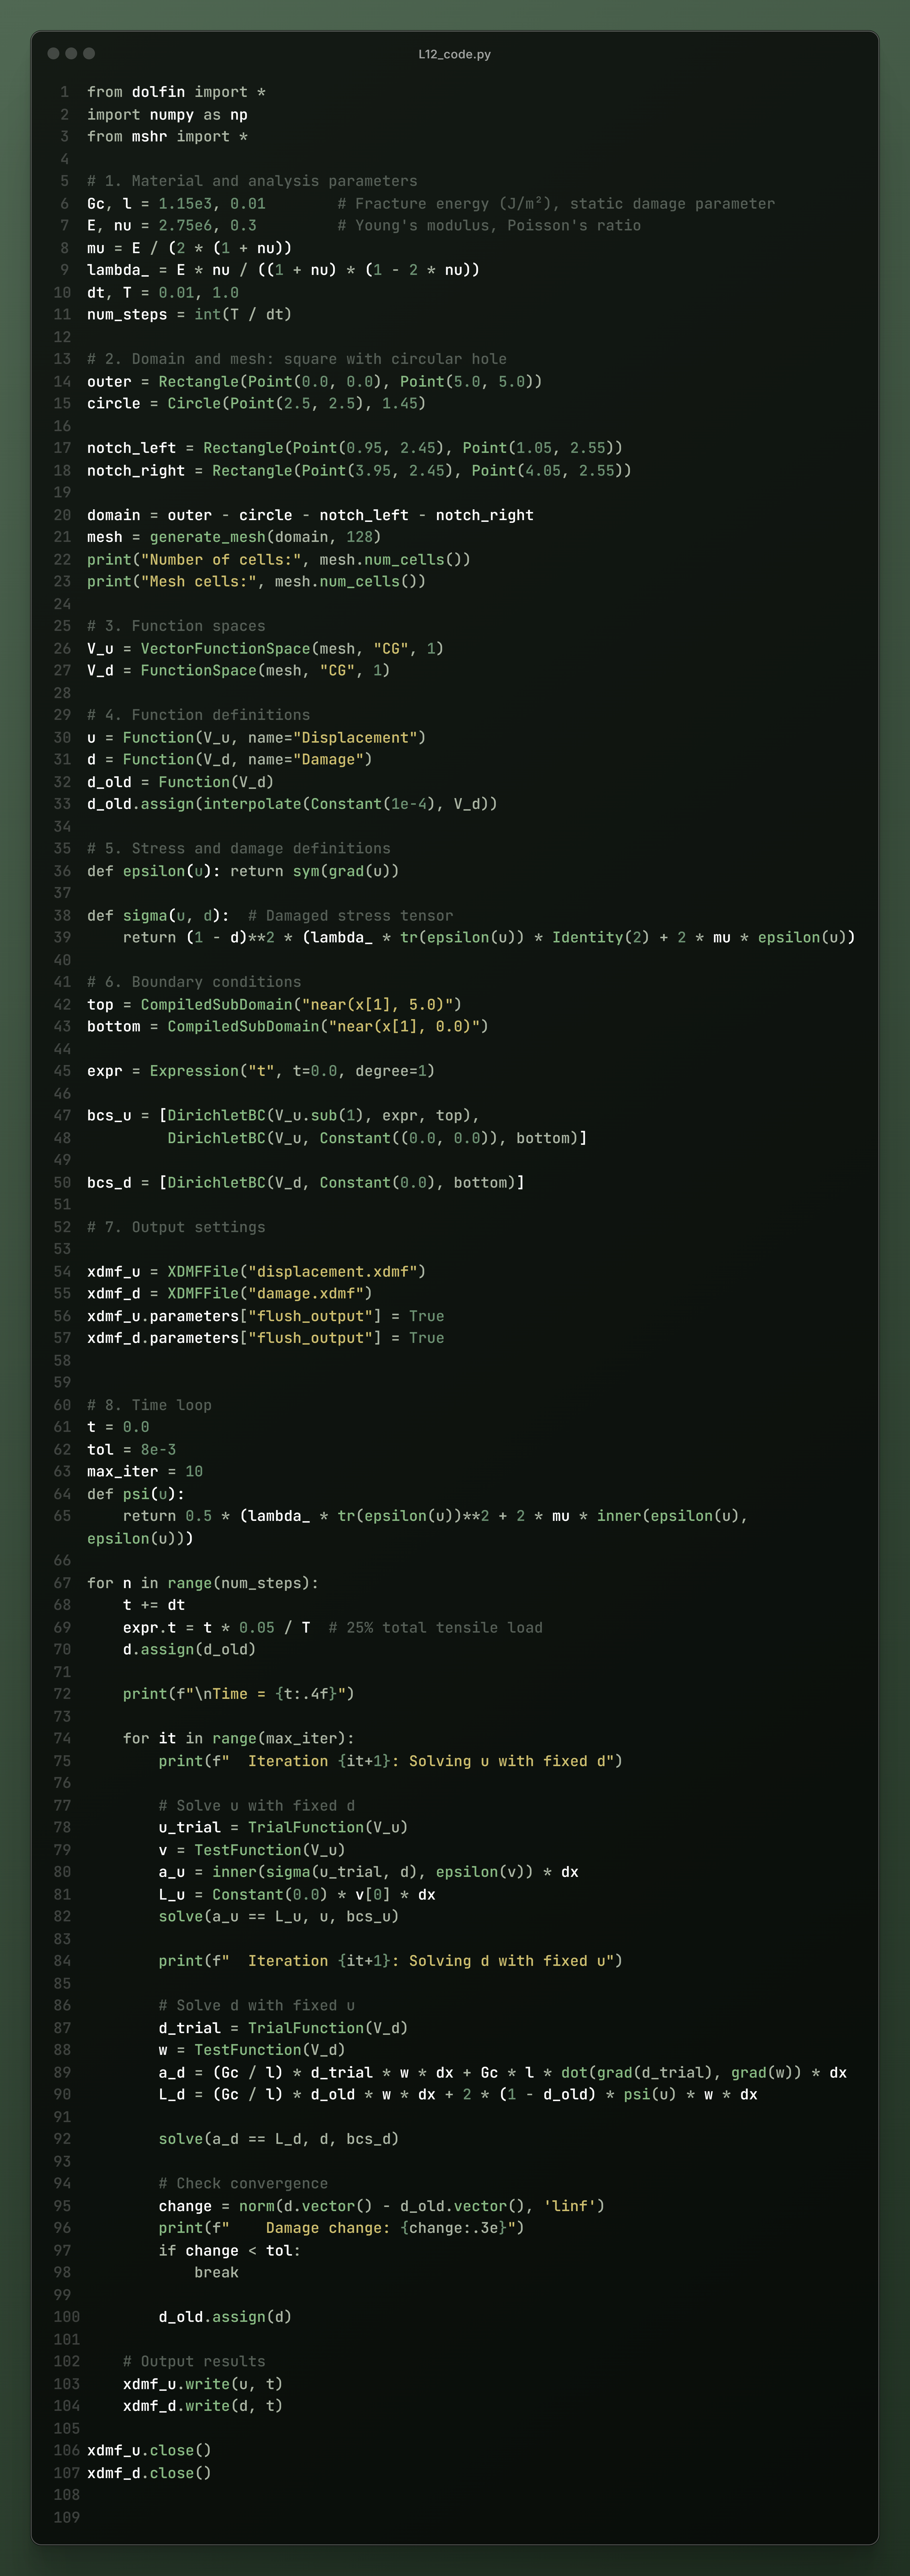


**Supplementary Figure 8. Final simulation code generated for Level 12 (phase-field fracture).** This figure presents the complete Python script automatically generated by MCP-SIM for the most challenging benchmark prompt (Level 12), which involves phase-field crack propagation in a 2D domain with a central circular void. The code includes physically consistent parameter initialization, boundary and initial condition assignment, alternating solution of displacement and damage fields, and convergence monitoring through a self-correcting loop. This result was obtained without manual intervention, demonstrating MCP-SIM’s ability to autonomously generate stable, executable finite element models from vague natural language prompts through multi-agent reasoning and physics-aware heuristics.


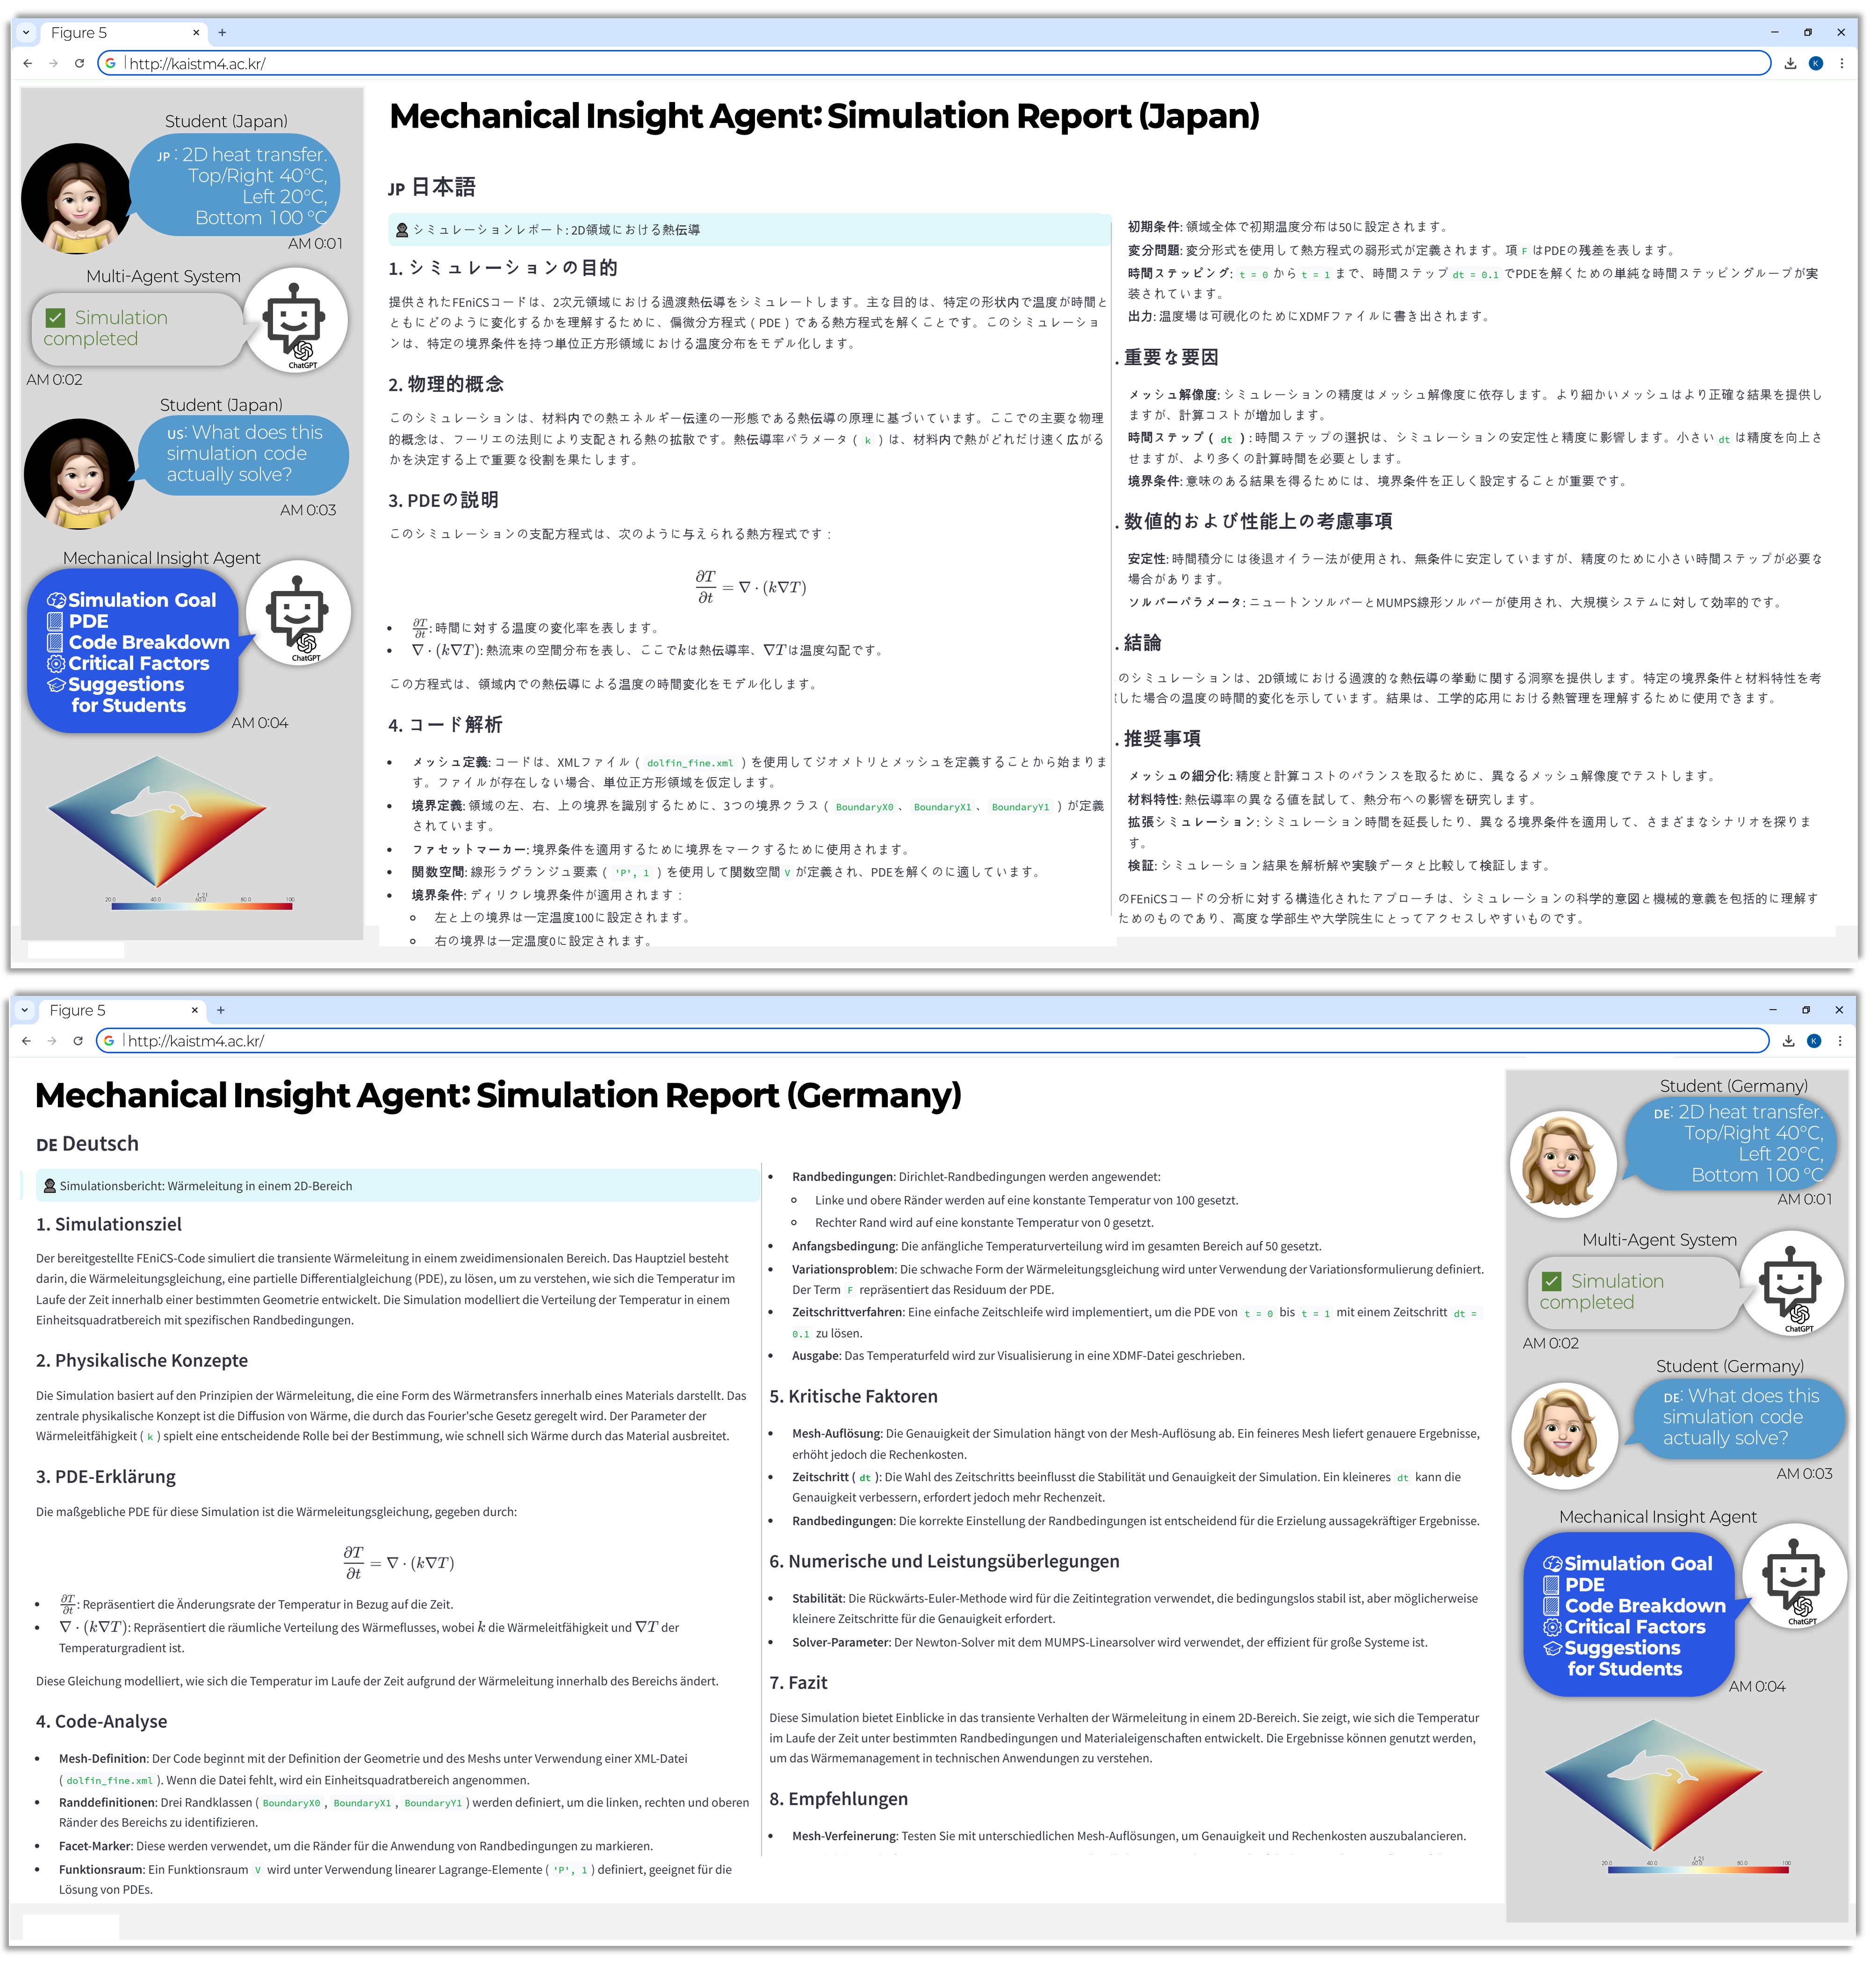


**Supplementary Figure 9. Multilingual simulation reports generated by the Mechanical Insight Agent in Japanese (top) and German (bottom).** These reports illustrate MCP-SIM’s capacity to deliver structured, domain-informed simulation explanations in multiple languages. The reports maintain a consistent pedagogical format across languages, including explanations of the simulation goal, underlying physics, PDE formulation, numerical strategies, and modeling assumptions. Each report is automatically generated from code and context, enabling simulation transparency and accessibility for learners from diverse linguistic and disciplinary backgrounds.

**References**

1. **Alnæs, M. S., Blechta, J., Hake, J.,** et al. (2015). The FEniCS Project Version 1.5. **Archive of Numerical Software, 3**(100), 9–23. DOI: 10.11588/ans.2015.100.20553.
